# Supplementary material for: eEF1Bγ binds the Che-1 and TP53 gene promoters and their transcripts
Source: PubMed Central journal article supplement (PMC5027090; doi:10.1186/s13046-016-0424-x), 2016-09-17

**A**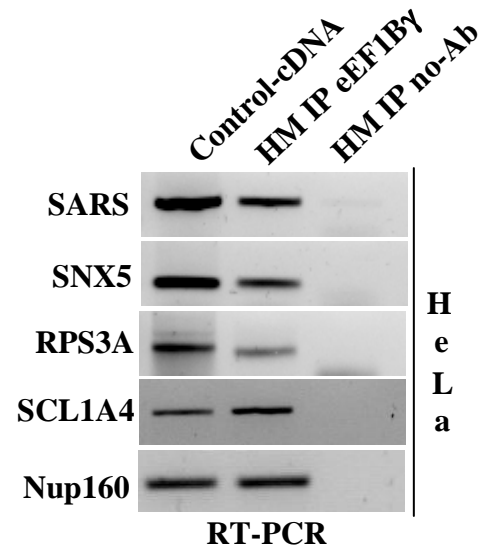**B**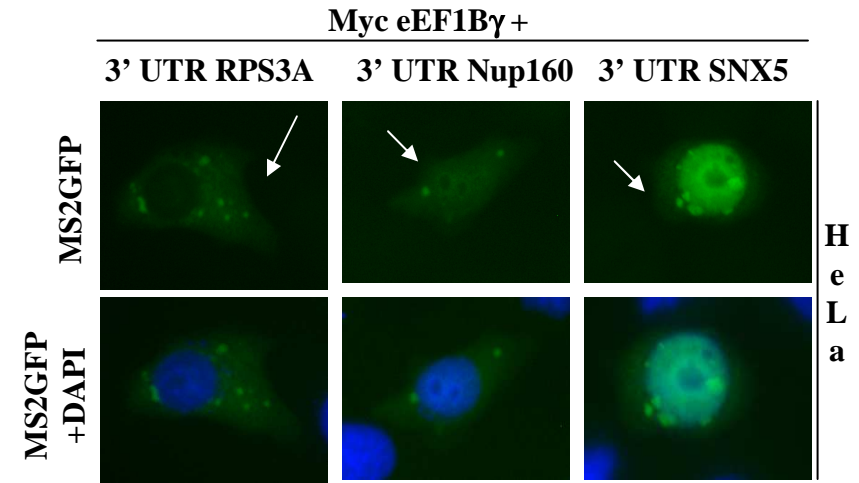**C**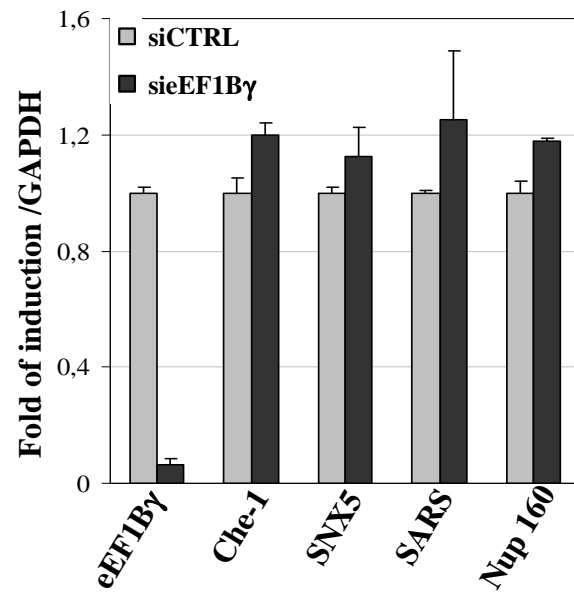**D**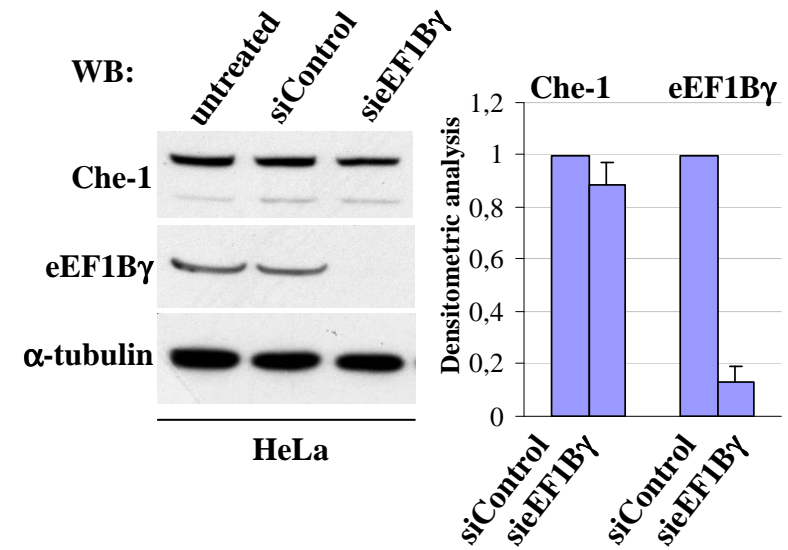

Supplement: 13046_2016_424_MOESM3_ESM.pdf [file 13046_2016_424_MOESM3_ESM.pdf]
