# Supplementary material for: eEF1Bγ binds the Che-1 and TP53 gene promoters and their transcripts
Source: Springer Nature journal article supplement (doi:10.1186/s13046-016-0424-x), 2016-09-17

**A**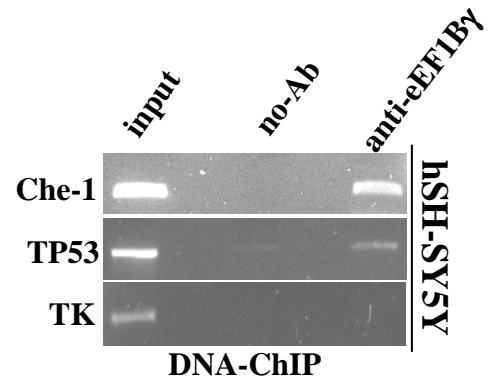**B**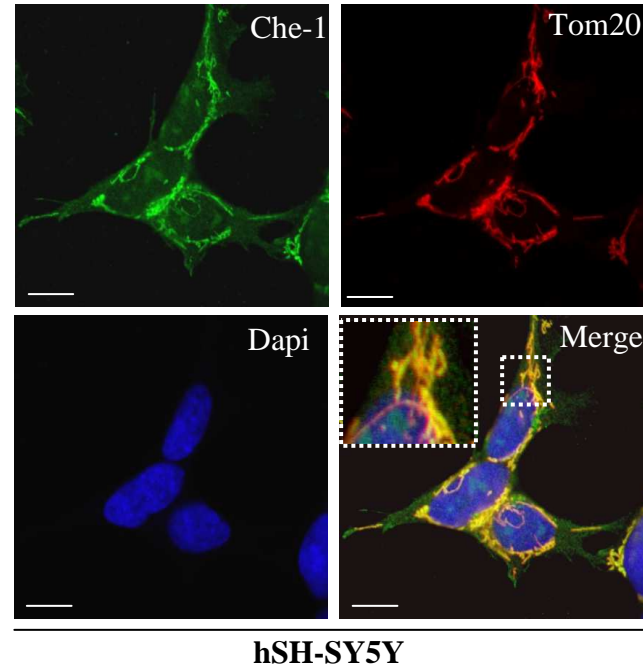**C**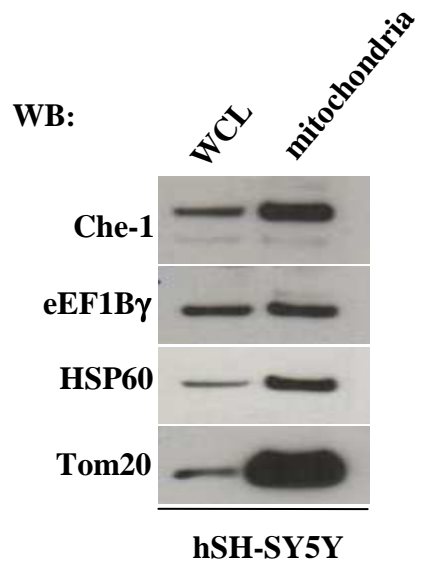**D**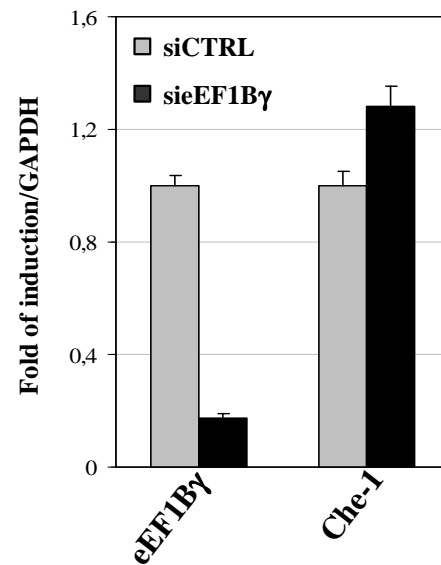**E**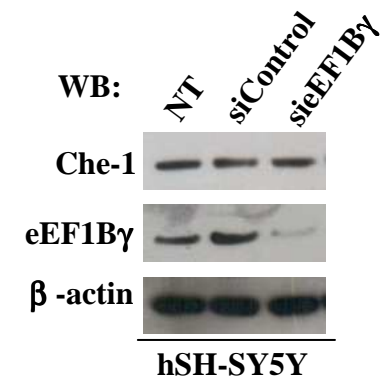

Supplement: MOESM4 [file 10710524]
